# Supplementary figures and images for: Disrupted functional connectivity of the periaqueductal gray in chronic low back pain
Source: PubMed Central journal article supplement — Neuroimage Clin. 2014 Aug 23;6:100–8. doi: 10.1016/j.nicl.2014.08.019 (PMC4215524; doi:10.1016/j.nicl.2014.08.019), 2014-08-23

Figure S1

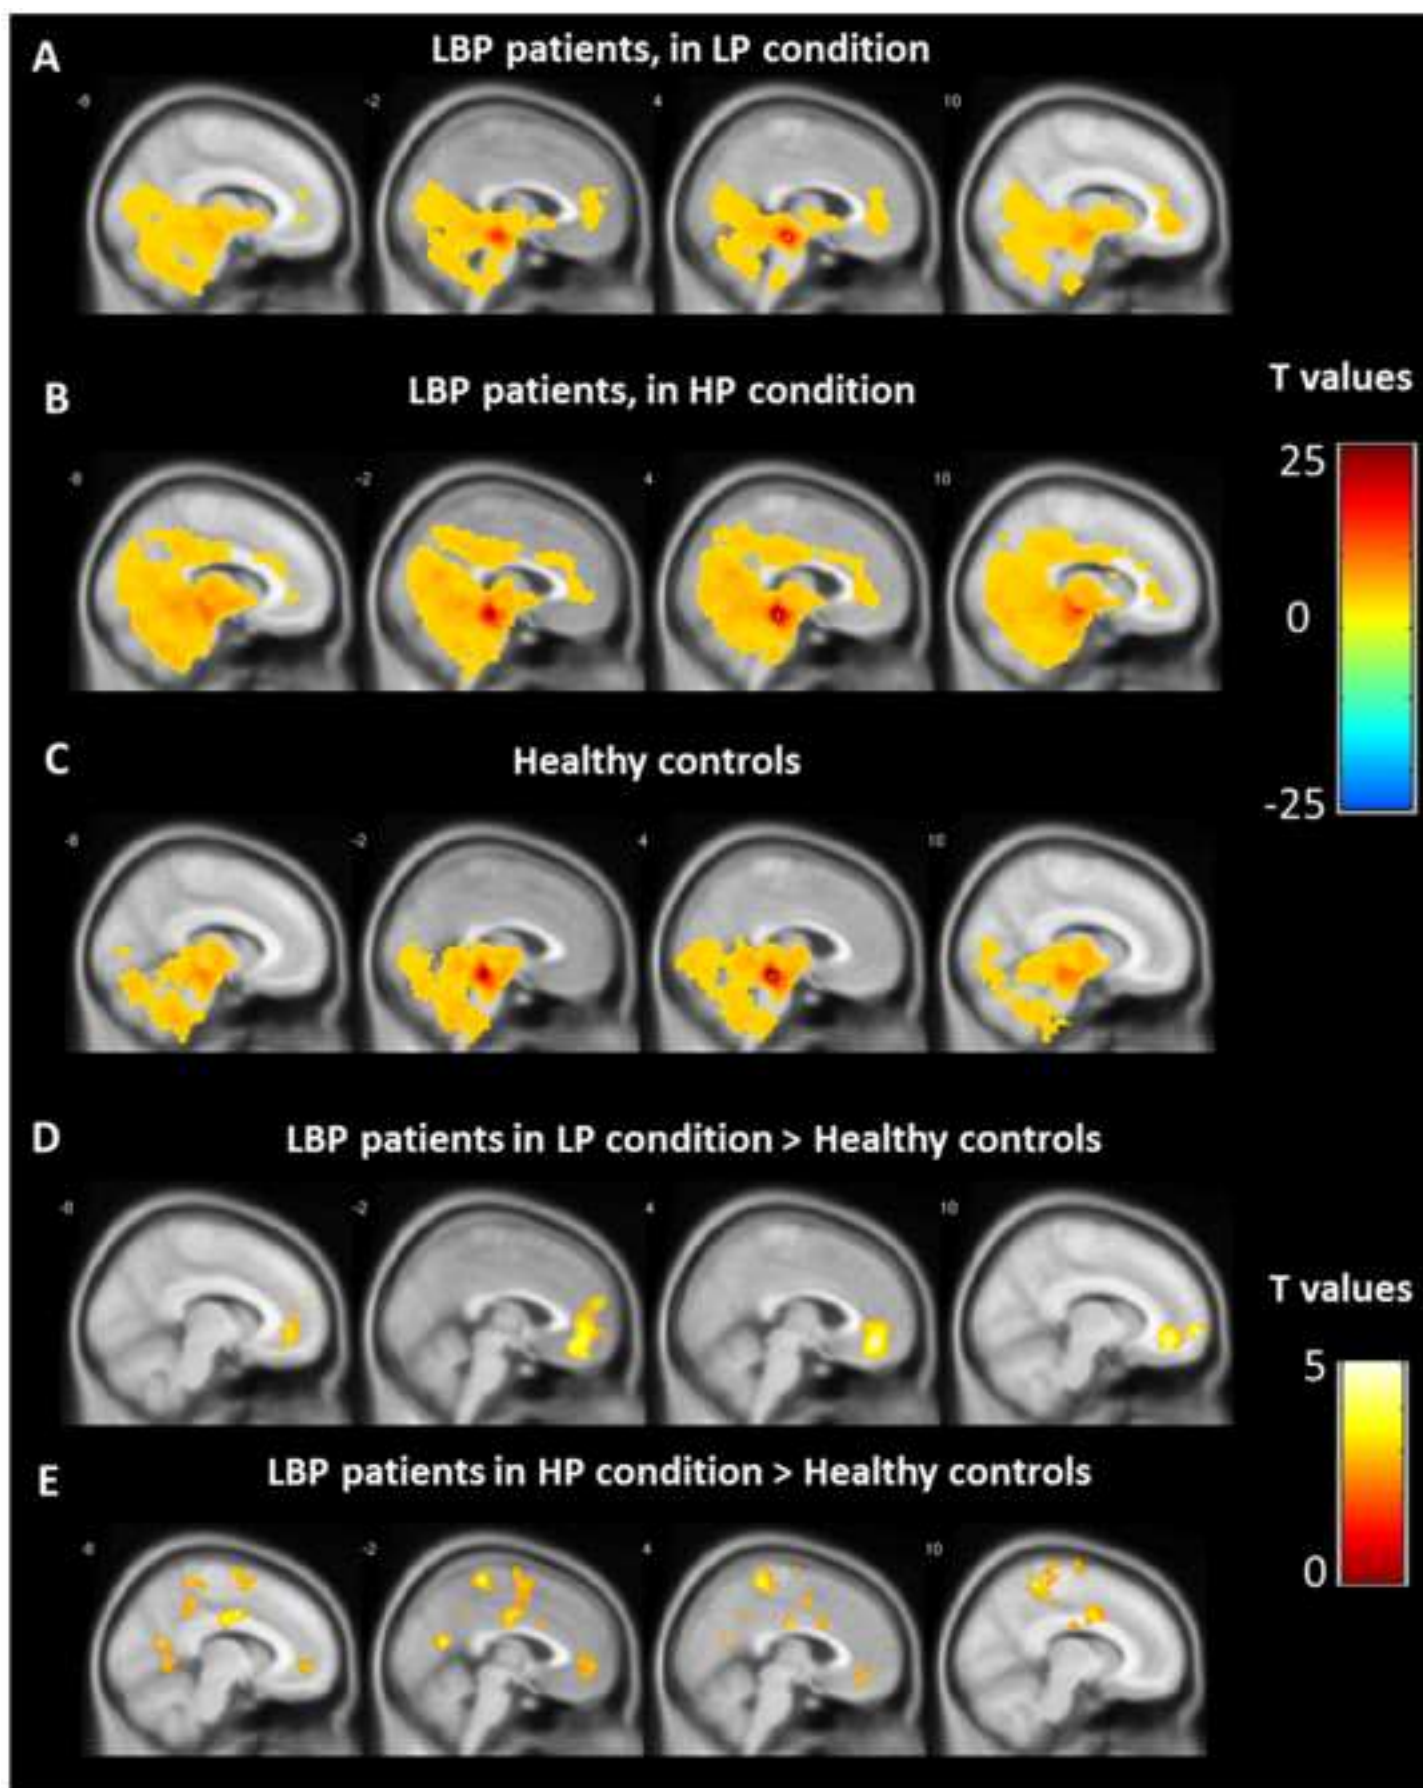

Supplement: mmc1.pdf [file mmc1.pdf]
